# Supplementary material for: Alpha lipoic acid mitigates adverse impacts of drought stress on growth and yield of mungbean: photosynthetic pigments, and antioxidative defense mechanism
Source: PeerJ journal article supplement (doi:10.7717/peerj.17191), 2024-04-29
Supplement: Raw_Data.zip [file Raw_Data.zip]

## Sheet: Raw data
s.no	Treatments	Treatments	Varieties	Water Stress	Replicate	Shoot fresh weight	Shoot dry weight	Root fresh weight	Root dry weight	Shoot length	Root length	Chlorophyll a	Chlorophyll b	Total Chlorophyll	Chl a/b	Proline	Ascorbic acid	Hydrogen peroxide	Malondialdhyde	Glycine betaine	Total Phenolics	Flavonoids	Total Soluble Proteins	CAT	SOD	POD	Number of seed per pod	Number of pod per plant	Hundred grain weight	Total grain yield
1	Control	0mM	V1	1	1	2.23216	9.57694	6.05534	3.31282	51.084	33.4737	1.73466	0.670306	2.42301	2.44079	3.24351	104.006	136.69	5.71493	10.3711	83.648	31.495	514.021	1.20012	21.0439	7.28927	25.7312	32.3296	38.2148	514.744
2	Control	0mM	V1	1	2	2.26162	10.1192	6.13525	3.57128	52.1775	32.7776	1.74796	0.642712	2.37262	2.63122	3.10999	106.232	133.847	6.1608	9.94414	86.0252	32.3901	517.964	1.17516	21.3216	7.01597	26.4625	30.9988	40.3787	518.692
3	Control	0mM	V1	1	3	2.55621	11.2038	6.93441	3.9159	58.7385	28.9487	1.52174	0.573728	2.09547	2.88512	2.77619	119.591	118.212	6.7553	8.87681	74.1393	27.9148	450.93	1.03788	24.0989	6.25073	22.8062	27.6716	44.7065	451.564
4	Stress	0mM	V1	2	1	2.15776	9.59231	5.48076	2.94456	46.49	30.2389	1.43736	0.567903	2.06142	2.66981	3.57693	100.088	129.707	12.853	11.239	64.0247	31.0441	439.06	0.946428	22.1364	7.01105	23.3297	28.7702	40.1407	488.861
5	Stress	0mM	V1	2	2	2.17432	9.19744	5.63651	2.98342	49.1225	29.61	1.5495	0.61221	2.10555	2.61428	3.856	100.088	137.052	12.3981	11.239	67.6501	30.3984	473.315	1.02027	21.2251	7.2103	23.9927	28.9909	41.2815	478.695
6	Stress	0mM	V1	2	3	1.89292	8.21025	4.85773	3.37202	54.3875	26.1512	1.69902	0.671286	2.37031	2.3089	4.22809	87.4676	151.741	11.0335	9.82185	74.9009	26.8475	518.989	1.11872	18.947	6.21407	20.6777	25.2389	35.5778	422.777
7	Priming(control)	0.1mM	V1	1	1	3.13921	13.689	9.89244	4.92794	72.0447	43.1468	1.88078	0.703281	2.77134	2.77266	5.53759	154.782	187.898	20.8124	14.3996	106.784	32.7969	525.668	1.96195	37.3257	7.1937	38.014	41.1389	54.0356	590.43
8	Priming (control)	0.1mM	V1	1	2	3.22843	14.0781	10.6642	5.20698	75.4897	43.1468	1.92104	0.688655	2.77134	2.92966	5.42243	149.304	187.898	21.9909	14.1001	115.115	35.3557	536.92	1.98785	38.3865	7.24889	36.4491	40.2833	55.5712	603.069
9	Priming (control)	0.1mM	V1	1	3	2.78236	12.1329	11.6933	5.76507	64.4657	37.7063	2.1626	0.608211	2.42189	3.24366	4.78902	132.871	164.205	24.3479	12.453	126.223	38.7674	604.435	2.24677	33.0827	6.31074	32.5369	35.5778	47.8931	678.901
10	Priming (Stress)	0.1mM	V1	2	1	2.75759	12.9218	10.5498	4.88894	68.3879	36.0946	1.72495	0.608501	2.55857	2.95913	5.76792	127.458	178.832	16.5121	14.0507	101.75	32.9125	496.885	1.80145	36.2917	6.32657	29.754	34.056	54.6762	603.151
11	Priming (Stress)	0.1mM	V1	2	2	2.81662	12.6531	10.8496	5.02788	70.3314	36.5709	1.82263	0.642957	2.68091	2.95913	6.09453	134.676	183.914	16.73	13.5239	104.642	33.3469	525.021	1.90346	35.5369	6.82017	32.0754	34.785	52.4254	603.151
12	Priming (Stress)	0.1mM	V1	2	3	3.17079	11.1751	9.35056	4.33319	60.6139	41.3345	2.01798	0.71187	2.28941	2.586	6.74774	149.11	158.503	18.9092	12.0488	90.1837	37.6905	581.293	2.10747	31.3858	7.47829	35.1706	39.159	46.7984	527.098
13	Priming(control)	0.15mM	V1	1	1	2.80669	14.3885	11.6033	5.40356	69.023	45.425	2.06164	0.699555	2.50336	3.1058	5.48001	138.798	195.477	23.0306	12.9898	107.894	33.1799	572.35	2.1884	34.2923	6.54317	39.0292	41.407	54.0356	672.109
14	Priming (control)	0.15mM	V1	1	2	3.02567	13.7962	11.362	5.55713	69.9339	43.7219	2.16022	0.699555	2.64511	3.19406	5.48001	140.63	188.147	23.6851	13.1612	114.004	35.0587	599.718	2.2506	36.9677	6.68323	38.2175	41.407	55.5712	648.324
15	Priming (control)	0.15mM	V1	1	3	3.31764	12.3154	10.0347	4.78931	79.0432	38.9531	1.84476	0.611346	2.92861	2.75275	4.78902	158.948	167.626	20.4126	14.8756	126.223	38.8164	512.139	1.93964	40.535	7.5236	33.7533	36.1859	47.8931	576.968
16	Priming (Stress)	0.15mM	V1	2	1	3.12428	12.7875	10.9041	4.37108	71.0542	40.4838	1.97294	0.680154	2.44844	3.08585	6.38485	142.102	190.958	17.8922	13.7858	105.365	35.5246	551.715	2.0248	33.9461	6.39331	30.9933	37.0418	54.3245	537.641
17	Priming (Stress)	0.15mM	V1	2	2	3.01371	12.7875	10.4953	4.71211	68.1292	41.6343	2.02901	0.699483	2.48076	2.97015	6.56629	146.14	183.097	18.4007	13.8915	101.027	36.5341	567.394	2.08234	34.3941	6.75534	32.7483	38.8131	53.1947	568.085
18	Priming (Stress)	0.15mM	V1	2	3	2.68202	11.1751	9.35056	5.16681	60.8167	35.8818	1.74867	0.602837	2.80389	2.64619	5.65905	125.948	163.445	15.8583	12.0937	90.1837	31.4863	488.999	1.79463	38.8741	7.47938	36.2583	33.1451	46.9809	628.973
25	Foliar(control)	0.1mM	V1	1	1	2.85617	11.4933	7.6626	4.27906	59.8148	36.3264	1.95853	0.681057	2.72614	3.06478	4.78946	123.091	154.513	19.3289	11.8248	116.257	34.8298	549.189	1.42843	33.2087	6.55396	35.8152	37.3961	45.1883	584.099
26	Foliar(control)	0.1mM	V1	1	2	2.93734	11.645	7.82662	4.61291	64.4815	37.104	2.01419	0.686281	2.61392	3.00105	4.8262	132.694	157.821	18.9269	12.7473	111.471	35.8196	564.796	1.50931	34.1525	6.64046	34.4724	38.4588	47.7471	600.699
27	Foliar(control)	0.1mM	V1	1	3	2.53149	13.1618	8.81077	5.05804	70.7037	41.7696	1.73589	0.597463	2.33336	2.65049	4.2016	145.499	177.666	16.716	13.9774	99.5068	30.8705	486.76	1.67108	29.4337	7.50541	30.7124	33.1451	52.8646	517.702
28	Foliar(STRESS)	0.1mM	V1	2	1	2.65546	11.5427	7.10182	4.21992	57.6247	32.543	1.90436	0.592749	2.25408	2.65141	5.861	132.801	161.801	10.173	12.9347	92.5166	30.7113	541.267	1.49647	27.6726	7.30806	31.5637	35.3376	50.425	559.729
29	Foliar(STRESS)	0.1mM	V1	2	2	2.73093	11.6313	7.30365	4.33985	58.3852	34.3858	1.86476	0.638995	2.42994	2.70816	5.73911	130.039	161.801	10.749	12.477	92.5166	32.4503	530.01	1.46534	29.8316	7.00722	32.4607	36.3418	48.5344	536.688
30	Foliar(STRESS)	0.1mM	V1	2	3	2.3536	10.126	6.29452	3.74022	65.9902	38.0712	1.64693	0.700656	2.66442	3.0487	5.06871	114.849	141.399	11.9011	11.1038	80.8509	35.9284	468.098	1.29417	32.7102	6.25511	27.9757	31.3206	43.2407	479.083
31	Foliar(control)	0.15mM	V1	1	1	2.95763	12.5054	8.07499	4.50953	61.3668	39.0808	1.75107	0.620032	2.6986	3.03064	4.35704	124.811	177.113	19.1359	11.6607	115.061	31.3061	497.793	1.63722	34.238	7.11	34.3162	38.3693	50.1245	526.769
32	Foliar(control)	0.15mM	V1	1	2	2.83588	12.8608	8.705	4.76488	64.8417	40.9496	1.88769	0.633304	2.64248	3.03064	4.45031	131.878	170.845	19.1359	12.321	112.668	33.7486	536.631	1.68375	35.211	7.31206	34.5795	36.7897	51.549	567.867
33	Foliar(control)	0.15mM	V1	1	3	2.53149	11.0838	9.54501	5.27559	71.7915	34.9696	2.06985	0.712938	2.3338	2.6485	5.00991	146.013	152.042	16.723	13.6416	99.5068	37.0053	588.414	1.45111	30.346	6.30177	30.1043	32.841	44.4266	622.664
34	Foliar(STRESS)	0.15mM	V1	2	1	2.37419	10.7371	7.71938	4.58299	63.8135	36.3668	1.71482	0.598915	2.27753	2.85741	5.80005	133.162	147.606	11.1027	11.4626	94.2841	34.1351	495.945	1.54531	28.8902	7.2434	28.8338	31.2877	49.2906	557.168
35	Foliar(STRESS)	0.15mM	V1	2	2	2.55942	10.9669	7.93875	4.39433	65.627	37.4003	1.73746	0.632829	2.40649	2.99404	5.80005	133.162	155.964	11.4182	11.6139	90.7491	35.1052	502.49	1.54531	30.5261	7.09276	31.0834	33.7288	49.6687	545.581
36	Foliar(STRESS)	0.15mM	V1	2	3	2.8064	12.346	6.84187	3.92267	56.5595	32.2328	1.96377	0.700656	2.66442	2.55681	5.06871	116.371	172.68	9.8406	13.1266	80.8509	30.2548	567.942	1.35046	33.798	6.26424	34.0828	36.9835	43.2407	481.85
43	Priming+Foliar(control)	0.1mM	V1	1	1	2.59229	9.99535	8.14867	4.26325	62.4412	36.7099	1.83044	0.607638	2.57245	2.86133	3.71256	128.825	145.382	15.3112	12.5389	101.16	32.8382	523.923	1.44583	26.2808	6.38028	30.9248	35.4918	46.2022	540.699
44	Priming+Foliar(control)	0.1mM	V1	1	2	2.59229	10.5613	7.9792	4.08775	64.2157	37.7532	1.88245	0.615657	2.476	2.94264	3.76156	123.522	149.513	15.4287	12.0227	104.034	33.7714	538.812	1.41576	27.7689	6.74156	32.4036	35.4918	45.2413	556.065
45	Priming+Foliar(control)	0.1mM	V1	1	3	2.26542	11.6933	7.04713	3.649	55.3432	32.5369	1.62236	0.69585	2.20594	2.53607	4.25153	110.264	128.855	13.4319	10.7323	89.6603	29.1053	464.366	1.25038	30.7452	7.46413	27.6716	31.0165	39.9566	479.235
46	Priming+Foliar(stress)	0.1mM	V1	2	1	2.35698	9.11863	6.62227	3.60137	51.139	34.4582	1.52464	0.673445	2.35562	2.69881	4.84116	111.375	142.552	9.07977	9.90773	76.5021	32.7529	457.132	1.34751	26.7215	7.03783	28.4759	32.5929	45.0576	540.656
47	Priming+Foliar(stress)	0.1mM	V1	2	2	2.42397	9.23897	6.37398	3.60137	54.0348	33.7416	1.64359	0.645722	2.42256	2.77551	4.97874	112.229	136.684	8.89094	10.6807	78.1397	32.0717	492.797	1.35785	25.6214	7.23783	29.2852	33.5192	43.463	520.385
48	Priming+Foliar(stress)	0.1mM	V1	2	3	2.08905	10.4424	5.67876	3.14726	59.8263	29.8002	1.8022	0.576415	2.08784	2.39203	4.29084	97.7048	122.013	7.85237	11.7114	87.9653	28.3254	540.35	1.18212	22.8714	6.2378	25.2389	28.8879	38.6794	463.626
49	Priming+Foliar(control)	0.15mM	V1	1	1	2.64181	11.0644	7.5207	4.32486	55.2136	32.5147	1.83044	0.659943	2.51611	2.95617	4.02288	129.053	136.117	14.7924	12.4878	90.4443	34.3405	528.976	1.43822	30.121	7.0627	28.4957	36.1698	43.0285	562.536
50	Priming+Foliar(control)	0.15mM	V1	1	2	2.54276	11.3789	7.68169	4.23492	59.5214	35.0515	1.88245	0.678698	2.53542	2.83448	4.1372	126.369	146.737	15.109	12.2281	97.5007	32.9268	544.009	1.43822	30.977	7.26342	28.8718	34.8137	43.5964	539.379
51	Priming+Foliar(control)	0.15mM	V1	1	3	2.26542	9.80669	8.64761	3.74022	65.265	38.4338	1.62236	0.584924	2.20729	2.53024	3.56557	111.608	160.896	17.0089	10.7997	106.909	29.3927	468.845	1.25687	26.697	6.25985	32.6325	31.0165	49.2751	481.486
52	Priming+Foliar(stress)	0.15mM	V1	2	1	2.44071	9.77787	6.14252	3.67017	56.9518	33.752	1.5405	0.666514	2.1061	2.41294	5.01313	105.272	145.92	8.98535	9.91924	85.9378	32.6002	460.366	1.22282	26.7767	6.29235	28.7769	32.2498	41.6037	529.995
53	Priming+Foliar(stress)	0.15mM	V1	2	2	2.34024	10.0557	6.62175	3.53256	58.5703	33.752	1.62773	0.652653	2.27041	2.6012	4.80676	107.526	142.885	8.98535	10.4809	82.8965	32.6002	486.434	1.249	26.2199	6.78327	27.5923	33.1663	42.1528	534.061
54	Priming+Foliar(stress)	0.15mM	V1	2	3	2.08905	8.66638	7.26073	3.14726	50.4778	29.4961	1.8022	0.576415	2.4895	2.85221	4.29084	121.046	126.195	7.85237	11.6043	73.7728	28.4896	538.57	1.40605	23.1571	7.43784	24.6307	28.5838	47.6434	464.943
55	Control	0mM	V2	1	1	2.61074	10.1225	7.33341	4.10755	60.7513	35.8152	1.8616	0.602042	2.27106	2.6533	3.75491	119.287	140.488	7.54807	10.3958	83.7081	33.3188	515.501	1.32879	27.3024	6.38028	30.2389	29.754	43.7431	487.926
56	Control	0mM	V2	1	2	2.55644	10.9123	7.54181	4.13906	58.2504	34.4724	1.91451	0.609988	2.39966	2.80355	3.67682	124.99	140.488	7.97548	10.6912	84.8129	32.0695	530.151	1.28177	27.3024	6.74156	29.61	32.0754	44.9862	498.37
57	Control	0mM	V2	1	3	2.25782	11.9652	6.49978	3.60339	51.9982	30.7124	1.64998	0.689442	2.65685	3.10403	3.24732	106.738	122.774	8.8303	9.21404	95.8602	28.5717	456.901	1.14069	23.8597	7.46413	26.1512	35.1706	38.7706	561.037
58	Stress	0mM	V2	2	1	2.15215	10.3902	6.09172	3.75056	48.4653	32.3296	1.73695	0.649916	2.46477	2.77918	3.97047	107.489	149.756	13.6536	12.0487	74.6574	32.47	499.499	1.06989	24.304	6.48752	25.8862	30.1913	41.4937	451.779
59	Stress	0mM	V2	2	2	2.19822	10.1741	5.96503	3.67256	52.2465	30.9988	1.78631	0.654902	2.36331	2.85816	4.1953	110.543	154.012	13.8338	11.597	76.779	31.1333	513.695	1.13047	24.9947	6.57314	24.9157	31.0493	43.4778	477.362
60	Stress	0mM	V2	2	3	2.47463	8.98566	5.26824	3.24356	57.2882	27.6716	1.5395	0.570145	2.10965	2.46325	4.64496	95.2699	132.732	15.6357	10.3321	66.1707	27.7917	442.719	1.25163	21.5412	7.42933	22.1981	26.7593	37.1286	528.526
61	Priming(control)	0.1mM	V2	1	1	3.41869	13.0637	10.3526	5.2976	79.8165	45.7897	2.24196	0.696323	2.86137	3.20021	5.77348	142.376	204.785	25.9573	14.9691	128.012	38.091	618.408	2.04592	41.7708	7.13042	38.3109	39.0516	57.4473	665.462
62	Priming (control)	0.1mM	V2	1	2	3.41869	13.8034	11.1603	5.411	78.1566	46.1409	2.14967	0.716111	2.94269	3.29115	5.77348	144.255	197.107	26.695	14.3529	131.65	38.3832	592.951	2.07292	40.2047	7.33305	38.8165	41.2629	55.0824	697.282
63	Priming (control)	0.1mM	V2	1	3	2.98762	15.2829	12.2372	6.0914	69.0269	40.1694	1.91894	0.617168	2.53611	2.83643	5.04549	163.046	175.608	23.0066	12.8124	113.46	33.4157	529.308	2.34293	35.8195	6.31987	43.8726	45.6855	49.1703	595.456
64	Priming (Stress)	0.1mM	V2	2	1	3.19103	13.5704	10.8843	5.21938	64.7761	42.9321	1.86144	0.632571	2.8391	2.78376	6.64244	152.231	192.127	19.861	14.2722	115.312	37.3098	587.884	2.07503	38.8007	7.09051	38.8224	40.5009	49.9625	629.524
65	Priming (Stress)	0.1mM	V2	2	2	3.34362	13.5704	11.1936	5.21938	68.444	42.0393	2.00667	0.646111	2.78005	3.00094	6.83121	145.964	197.587	20.4254	14.3817	110.565	36.5339	563.683	2.134	37.2034	7.29202	39.1202	38.8336	50.6219	647.414
66	Priming (Stress)	0.1mM	V2	2	3	2.85534	11.8592	9.64704	4.56125	75.7799	37.1286	2.20031	0.727356	2.45531	3.29052	5.88736	130.297	170.287	17.6033	12.5204	98.698	32.2663	503.182	1.83915	33.2103	6.2845	34.0573	34.6655	57.2157	557.963
67	Priming(control)	0.15mM	V2	1	1	3.0451	14.6153	10.3526	5.84473	80.0304	42.2862	2.21889	0.624824	2.96564	3.18864	5.88378	154.782	198.012	26.8794	14.841	114.452	34.9925	631.033	2.27418	41.871	7.38371	43.2285	43.2285	56.9616	625.038
68	Priming (control)	0.15mM	V2	1	2	3.21752	15.0307	11.1603	5.63789	80.0304	43.1914	2.17274	0.673572	2.84355	3.27926	5.66318	159.181	199.531	25.7729	14.5324	123.382	35.7416	617.909	2.3388	42.1922	7.07976	44.457	44.457	55.7769	633.287
69	Priming (control)	0.15mM	V2	1	3	3.56238	12.9539	12.2372	5.01738	69.9392	48.6224	1.91894	0.73857	2.53835	2.82617	5.04549	137.187	173.708	23.0066	12.8348	135.288	40.2359	545.73	2.01566	36.7317	6.31987	38.3145	38.3145	49.2615	715.776
70	Priming (Stress)	0.15mM	V2	2	1	2.9968	13.8296	10.8843	4.649	72.7337	44.1907	1.8808	0.712156	2.81111	2.80653	6.64244	151.803	169.092	17.7572	12.9836	114.126	37.4856	611.181	2.18781	38.753	6.33669	36.5787	40.0841	54.2415	653.592
71	Priming (Stress)	0.15mM	V2	2	2	3.03635	13.3111	11.1936	4.91225	74.8007	44.1907	1.9873	0.686954	2.81111	2.96545	6.83121	148.646	182.284	19.1426	13.2616	111.752	37.4856	598.47	2.09775	37.947	6.83108	37.3617	39.2504	55.7829	626.686
72	Priming (Stress)	0.15mM	V2	2	3	3.43185	11.8592	9.64704	5.43875	64.4657	38.6186	2.20031	0.611346	2.45665	3.28329	5.88736	131.282	199.874	20.9899	14.9291	98.698	32.7589	528.561	1.87259	33.5143	7.49026	42.0597	34.6655	48.0756	559.422
79	Foliar(control)	0.1mM	V2	1	1	3.17612	13.3438	10.443	5.14625	71.0589	37.9943	2.14085	0.683186	2.542	2.81897	4.69978	131.103	175.864	21.5395	12.9785	117.907	33.0408	590.266	1.61439	36.7669	7.21086	33.7827	40.0841	47.5128	548.241
80	Foliar(control)	0.1mM	V2	1	2	3.04537	13.0663	10.2258	5.2925	71.604	38.4957	2.06058	0.702601	2.57555	2.97859	4.80038	138.527	184.273	21.5395	13.7134	121.258	33.4768	568.135	1.7058	35.4657	7.21086	35.6957	39.2504	50.2032	591.014
81	Foliar(control)	0.1mM	V2	1	3	2.7185	11.54	9.03128	4.56125	62.3371	43.51	1.83583	0.605524	2.91103	3.29784	5.404	153.374	157.363	18.8235	15.1832	104.504	37.8374	506.168	1.88863	31.5623	6.30162	39.5216	34.6655	55.584	648.045
82	Foliar(STRESS)	0.1mM	V2	2	1	2.56743	11.2574	9.25522	4.79616	67.51	38.4253	2.03877	0.672575	2.6687	3.11995	5.50525	137.131	171.113	12.9404	12.452	100.735	35.0151	497.646	1.63749	30.13	7.08228	32.9284	39.0067	46.0251	520.997
83	Foliar(STRESS)	0.1mM	V2	2	2	2.76774	11.4984	8.90821	4.59872	66.106	39.5173	1.95484	0.691688	2.68917	2.99152	5.81698	141.028	175.976	13.3081	12.6163	96.958	36.0102	525.825	1.63749	31.8361	7.28355	33.363	37.5442	48.6313	527.872
84	Foliar(STRESS)	0.1mM	V2	2	3	3.03482	12.9442	7.93657	4.10512	58.384	34.0573	1.74502	0.59612	2.34114	2.67043	6.44045	121.543	151.662	11.4694	14.2596	86.3827	31.0347	582.183	1.43101	35.2483	6.2772	37.7087	33.4492	53.8436	596.631
85	Foliar(control)	0.15mM	V2	1	1	3.13289	13.4138	9.57825	4.73917	64.328	41.0556	2.09269	0.708501	2.75548	3.11587	5.06493	146.439	166.225	21.4137	13.9778	122.096	35.9877	577.838	1.86666	33.8133	7.34862	37.7392	36.4112	52.8005	551.774
86	Foliar(control)	0.15mM	V2	1	2	3.06773	13.4138	9.78328	5.10892	65.705	42.2224	2.10874	0.679335	2.83379	3.20442	5.30713	150.601	168.419	20.6108	14.375	117.069	37.0105	582.271	1.9197	34.2596	7.07309	38.8117	36.8917	54.3011	583.019
87	Foliar(control)	0.15mM	V2	1	3	2.70938	11.7224	11.0135	5.60191	73.967	36.3886	1.83583	0.60642	2.44225	2.76168	4.53211	129.793	190.356	18.3627	12.3889	104.504	31.8968	506.914	1.65446	38.7221	6.30162	33.4492	41.6971	46.7984	645.507
88	Foliar(STRESS)	0.15mM	V2	2	1	2.60809	12.285	8.61995	4.90502	68.1998	40.1456	2.01779	0.602101	2.42855	3.08391	6.09408	123.69	179.856	13.0899	13.5941	98.4688	36.3549	558.453	1.76718	34.0388	7.33387	34.9945	37.7825	51.1537	572.057
89	Foliar(STRESS)	0.15mM	V2	2	2	2.75577	12.8724	8.73372	4.80301	68.1998	38.493	1.97582	0.649076	2.48053	3.01977	6.26726	133.34	172.452	13.4619	13.9804	99.2242	34.8583	574.323	1.70093	35.0061	7.03196	35.989	38.0724	52.6075	588.314
90	Foliar(STRESS)	0.15mM	V2	2	3	3.05114	10.9926	9.87133	4.24196	59.6003	34.3614	1.74502	0.71171	2.79244	2.66702	5.40133	146.207	153.942	11.6019	12.0488	86.3827	31.1168	494.971	1.5154	30.1694	6.2772	31.0165	33.1451	45.3388	507.029
97	Priming+Foliar(control)	0.1mM	V2	1	1	2.83685	11.6511	8.00598	4.47724	59.5244	35.0225	2.02579	0.674445	2.37322	3.11231	4.51929	117.891	141.868	16.0537	13.3032	110.194	30.6695	556.591	1.49857	28.1574	6.52196	34.4582	33.4349	49.3667	559.294
98	Priming+Foliar(control)	0.1mM	V2	1	2	2.73048	11.9822	8.6306	4.60447	60.31	37.0056	1.9541	0.674445	2.50761	3.04758	4.64772	127.088	152.937	16.3973	13.0265	110.194	32.4061	536.894	1.46741	30.3542	6.66157	33.7416	36.0435	48.34	575.189
99	Priming+Foliar(control)	0.1mM	V2	1	3	2.43267	10.3267	9.46342	3.96829	68.1657	40.9719	1.73903	0.589402	2.77637	2.69159	4.00556	139.352	167.695	18.4592	11.5049	96.2996	35.8794	477.802	1.29599	33.2833	7.49922	29.8002	39.5216	42.6933	495.717
100	Priming+Foliar(stress)	0.1mM	V2	2	1	2.57312	10.6013	7.87376	4.0957	58.6673	36.1877	1.62984	0.656911	2.27124	2.92171	5.42222	122.43	138.125	9.5531	11.3018	87.1538	33.6337	529.183	1.24162	28.9078	7.16003	28.8238	35.0684	41.5943	483.651
101	Priming+Foliar(stress)	0.1mM	V2	2	2	2.64625	10.9025	8.09753	3.94214	60.3345	36.1877	1.72213	0.67558	2.30121	2.81216	5.30945	125.909	139.948	10.094	11.9417	91.3212	33.6337	518.177	1.2682	28.3066	7.16003	30.456	33.8274	44.8394	511.038
102	Priming+Foliar(stress)	0.1mM	V2	2	3	2.28062	9.39617	6.97871	3.51216	51.9982	31.6247	1.90671	0.582237	2.60096	2.50544	4.68924	108.513	158.177	11.1759	13.2216	77.9853	29.3927	457.648	1.42767	25	6.25721	33.7203	30.1043	49.1663	565.811
103	Priming+Foliar(control)	0.15mM	V2	1	1	2.77303	12.097	9.41448	4.5297	65.5289	38.7684	1.81072	0.689941	2.62959	2.79194	4.04058	120.395	145.669	17.301	13.3365	98.1522	34.1351	504.494	1.50124	29.0702	7.33593	34.0999	33.4728	49.7928	501.923
104	Priming+Foliar(control)	0.15mM	V2	1	2	2.7943	11.599	9.21869	4.34323	67.3912	39.8702	1.83461	0.664073	2.70432	2.82879	4.35583	127.213	153.917	18.1283	13.3365	103.71	35.1052	511.153	1.50124	30.7163	7.07632	34.0999	35.3682	49.7928	541.082
105	Priming+Foliar(control)	0.15mM	V2	1	3	2.43267	10.354	8.14183	3.87706	58.0799	34.3614	2.07358	0.591641	2.33067	3.19725	4.77615	140.847	170.414	15.481	11.6549	114.826	30.2548	577.733	1.31194	34.0085	6.29749	29.8002	39.159	43.5143	593.295
106	Priming+Foliar(stress)	0.15mM	V2	2	1	2.30057	9.61637	8.53714	3.89957	61.4619	36.5244	1.80416	0.681293	2.46209	2.85159	4.88255	127.283	153.101	9.20255	12.5579	81.2002	34.7071	539.909	1.35181	29.999	6.37758	32.2498	31.6619	43.4217	539.567
107	Priming+Foliar(stress)	0.15mM	V2	2	2	2.48006	10.3666	8.21705	3.92949	58.9317	35.155	1.85544	0.653247	2.53206	2.87347	4.94699	122.043	157.452	9.46408	12.9148	82.2718	33.4058	539.909	1.41645	29.999	6.73871	33.1663	32.0798	45.8804	554.901
108	Priming+Foliar(stress)	0.15mM	V2	2	3	2.71937	11.367	7.32081	3.42094	52.6064	31.3206	1.59908	0.583132	2.18221	2.50159	5.59136	108.944	135.697	8.15645	11.1304	92.9882	29.7622	471.831	1.2096	26.2163	7.46098	28.5838	36.2583	50.7979	478.232
